# Supplementary material
Source: PubMed Central journal article supplement (PMC7723304)
Supplement: cs0c03138_si_001.pdf [file cs0c03138_si_001.pdf]

# Supporting Information

## Influence of Nanoscale Intimacy and Zeolite Micropore Size on the Performance of Bifunctional Catalysts for *n*-Heptane Hydroisomerization

*Jogchum Oenema<sup>†</sup>, Justine Harmel<sup>†</sup>, Roxana Pérez Vélez<sup>†</sup>, Mark J. Meijerink<sup>†</sup>, Willem  
Eijsvogel<sup>†</sup>, Ali Poursaeidesfahani<sup>‡</sup>, Thijs J.H. Vlugt<sup>‡</sup>, Jovana Zečević<sup>†</sup>, Krijn P. de Jong<sup>\*†</sup>*

<sup>†</sup> Inorganic Chemistry and Catalysis, Utrecht University, Universiteitsweg 99, 3584 CG  
Utrecht, The Netherlands.

<sup>‡</sup> Process & Energy Department, Delft University of Technology, Leeghwaterstraat 39,  
2628 CB Delft, The Netherlands.

\*E-mail: [k.p.dejong@uu.nl](mailto:k.p.dejong@uu.nl)

|                                                                                                                                                                                                                  |            |
|------------------------------------------------------------------------------------------------------------------------------------------------------------------------------------------------------------------|------------|
| <b>Supporting Information 1:</b> Definitions of <i>n</i> -C <sub>7</sub> conversion, Yields and Selectivities                                                                                                    | <b>S3</b>  |
| <b>Table S1:</b> Structural properties of the parent zeolites as provided by Zeolyst, International Zeolite Database and TEM.                                                                                    | <b>S4</b>  |
| <b>Figure S1:</b> Structural properties of parent zeolites and zeolite/ $\gamma$ - Al <sub>2</sub> O <sub>3</sub> composite supports from N <sub>2</sub> physisorption                                           | <b>S5</b>  |
| <b>Table S2:</b> Quantitative N <sub>2</sub> physisorption results                                                                                                                                               | <b>S6</b>  |
| <b>Figure S2:</b> NH <sub>3</sub> -TPD profiles of Pt/ $\gamma$ - Al <sub>2</sub> O <sub>3</sub> /zeolite composite catalysts and zeolite/ $\gamma$ - Al <sub>2</sub> O <sub>3</sub> composite supports          | <b>S7</b>  |
| <b>Table S3:</b> Total acidity from NH <sub>3</sub> -TPD of Pt/ $\gamma$ - Al <sub>2</sub> O <sub>3</sub> /zeolite composite catalysts and zeolite/ $\gamma$ - Al <sub>2</sub> O <sub>3</sub> composite supports | <b>S8</b>  |
| <b>Figure S3:</b> NH <sub>3</sub> -TPD profiles of parent zeolites                                                                                                                                               | <b>S9</b>  |
| <b>Table S4:</b> Results of deconvolution of NH <sub>3</sub> -TPD profiles and total acidity of parent zeolites                                                                                                  | <b>S10</b> |
| <b>Figure S4:</b> Arrhenius plots of Pt/ $\gamma$ - Al <sub>2</sub> O <sub>3</sub> /zeolite composite catalysts and physical mixtures in <i>n</i> -C <sub>7</sub> hydro-isomerization                            | <b>S11</b> |
| <b>Table S5:</b> Pre-exponential factors and apparent activation energies of Pt/ $\gamma$ - Al <sub>2</sub> O <sub>3</sub> /zeolite composite catalysts and physical mixtures                                    | <b>S12</b> |
| <b>Figure S5:</b> The cracking products distribution pattern for Pt/ $\gamma$ - Al <sub>2</sub> O <sub>3</sub> /zeolite composite catalysts and physical mixtures                                                | <b>S13</b> |
| <b>Figure S6:</b> Isomer product distribution for Pt/ $\gamma$ - Al <sub>2</sub> O <sub>3</sub> /zeolite composite catalysts                                                                                     | <b>S14</b> |
| <b>Figure S7:</b> Ratio between 2-Methylhexane and 3-Methylhexane for Pt/ $\gamma$ - Al <sub>2</sub> O <sub>3</sub> /zeolite composite catalysts                                                                 | <b>S15</b> |
| <b>Figure S8:</b> Equilibrium ratio between <i>i</i> -butane and <i>n</i> -butane                                                                                                                                | <b>S16</b> |
| <b>Figure S9:</b> Conversion of <i>n</i> -heptane as a function of temperature for Pt/ $\gamma$ - Al <sub>2</sub> O <sub>3</sub> /zeolite composite catalysts and physical mixtures                              | <b>S17</b> |

## 14 Supporting Information 1

15  $n$ -C<sub>7</sub> conversion ( $X_{n-C_7}$ ) was calculated by:

$$16 \quad X_{n-C_7} = \left(1 - \frac{F_{C \text{ wt. } n-C_7, \text{out}}}{F_{C \text{ wt. } n-C_7, \text{in}}}\right) \cdot 100\%$$

17 Wherein  $F_{C \text{ wt. } n-C_7, \text{out}}$  and  $F_{C \text{ wt. } n-C_7, \text{in}}$  are the flows, based on weight of carbon, of  $n$ -C<sub>7</sub> going out  
18 or into the reactor, respectively.

19 C<sub>7</sub> isomer yield ( $Y_{i-C_7}$ ) was calculated by:

$$20 \quad Y_{i-C_7} = \left(\frac{F_{C \text{ wt. } i-C_7, \text{out}}}{F_{C \text{ wt. } n-C_7, \text{in}}}\right) \cdot 100\%$$

21 The yield of cracked products ( $Y_{C_3+C_4}$ ) was calculated by:

$$22 \quad Y_{C_3+C_4} = \left(\frac{F_{C \text{ wt. } C_3, \text{out}} + F_{C \text{ wt. } C_4, \text{out}}}{F_{C \text{ wt. } n-C_7, \text{in}}}\right) \cdot 100\%$$

23 Wherein  $F_{C \text{ wt. } i-C_7, \text{out}}$  and  $F_{C \text{ wt. } C_m, \text{out}}$  are the flows, based on weight of carbon, of  $i$ -C<sub>7</sub> or cracked  
24 products C<sub>m</sub> ( $m = 1-6$ ), respectively, going out of the reactor.

25 The  $i$ -C<sub>7</sub> isomer selectivity ( $S_{i-C_7}$ ) was determined as follows:

$$26 \quad S_{i-C_7} = \left(\frac{F_{C \text{ wt. } i-C_7, \text{out}}}{F_{C \text{ wt. } n-C_7, \text{in}} - F_{C \text{ wt. } n-C_7, \text{out}}}\right) \cdot 100\%$$

27 The selectivity towards cracked products ( $S_{C_m}$ ) was determined as follows:

$$28 \quad S_{C_m} = \left(\frac{F_{C \text{ wt. } C_m, \text{out}}}{F_{C \text{ wt. } n-C_7, \text{in}} - F_{C \text{ wt. } n-C_7, \text{out}}}\right) \cdot 100\%$$

29

30 **Table S1.** Details of the parent zeolites.

|              | Zeolite Code <sup>a</sup> | Si/Al Zeolite <sup>a</sup> (at:at <sup>-1</sup> ) | Ring size <sup>b</sup> | Micropore size (nm) <sup>b</sup> | Micropore tortuosity <sup>b</sup> | Estimated particle size (nm) <sup>c</sup> |
|--------------|---------------------------|---------------------------------------------------|------------------------|----------------------------------|-----------------------------------|-------------------------------------------|
| ZSM-5        | CBV3024E                  | 15                                                | 10                     | 0.55 × 0.51 +<br>0.56 × 0.53     | Straight +<br>Sinusoidal          | 20-200                                    |
| Zeolite Beta | CP814E                    | 12.5                                              | 12                     | 0.66 × 0.67 +<br>0.56 × 0.56     | Straight pores                    | 20-50                                     |
| Zeolite Y    | CBV760                    | 30                                                | 12                     | 0.74 × 0.74                      | Straight pores<br>+ cages         | 200-1000                                  |

31 a) Manufacturers specification, Zeolyst.

32 b) International Zeolite Association (Ch. Baerlocher, L.B. McCusker; Database of Zeolite  
33 Structures)

34 c) Obtained from TEM analysis

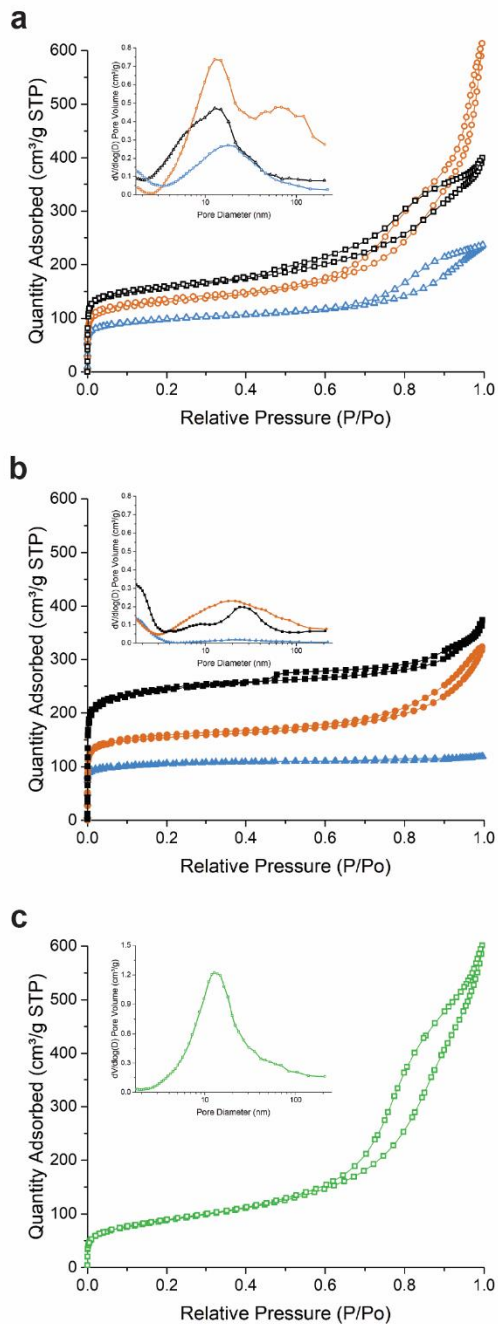

35

36 **Figure S1.** N<sub>2</sub> physisorption isotherms of the Zeolite/ $\gamma$ - Al<sub>2</sub>O<sub>3</sub> (50/50 wt.) composites, with the  
 37 BJH pore size distributions derived from the adsorption branch as insert (a): ZSM-5/ $\gamma$ - Al<sub>2</sub>O<sub>3</sub>  
 38 composite (blue), Zeolite Beta/ $\gamma$ -Al<sub>2</sub>O<sub>3</sub> composite (orange) and Zeolite Y/ $\gamma$ - Al<sub>2</sub>O<sub>3</sub> (black). Parent  
 39 zeolites (b): ZSM-5 (blue), Zeolite Beta (orange) and Zeolite Y (black) and the  $\gamma$ - Al<sub>2</sub>O<sub>3</sub> binder  
 40 (c).

41 **Table S2.** Quantitative information derived from N<sub>2</sub> physisorption measurements.

| Sample                                                  | BET<br>surface area<br>(m <sup>2</sup> ·g <sup>-1</sup> ) | t-plot<br>external<br>surface area<br>(m <sup>2</sup> ·g <sup>-1</sup> ) | t-plot<br>micropore volume<br>(cm <sup>3</sup> ·g <sup>-1</sup> ) | BJH<br>mesopore volume<br>(cm <sup>3</sup> ·g <sup>-1</sup> ) |
|---------------------------------------------------------|-----------------------------------------------------------|--------------------------------------------------------------------------|-------------------------------------------------------------------|---------------------------------------------------------------|
| ZSM-5/ $\gamma$ - Al <sub>2</sub> O <sub>3</sub>        | -                                                         | 135                                                                      | 0.09                                                              | 0.26                                                          |
| Zeolite Beta/ $\gamma$ - Al <sub>2</sub> O <sub>3</sub> | -                                                         | 187                                                                      | 0.12                                                              | 0.80                                                          |
| Zeolite Y/ $\gamma$ - Al <sub>2</sub> O <sub>3</sub>    | -                                                         | 209                                                                      | 0.15                                                              | 0.47                                                          |
| ZSM-5                                                   | -                                                         | 77                                                                       | 0.13                                                              | 0.04                                                          |
| Zeolite Beta                                            | -                                                         | 135                                                                      | 0.18                                                              | 0.30                                                          |
| Zeolite Y                                               | -                                                         | 231                                                                      | 0.28                                                              | 0.24                                                          |
| $\gamma$ - Al <sub>2</sub> O <sub>3</sub>               | 314                                                       | -                                                                        | -                                                                 | 0.89                                                          |

42

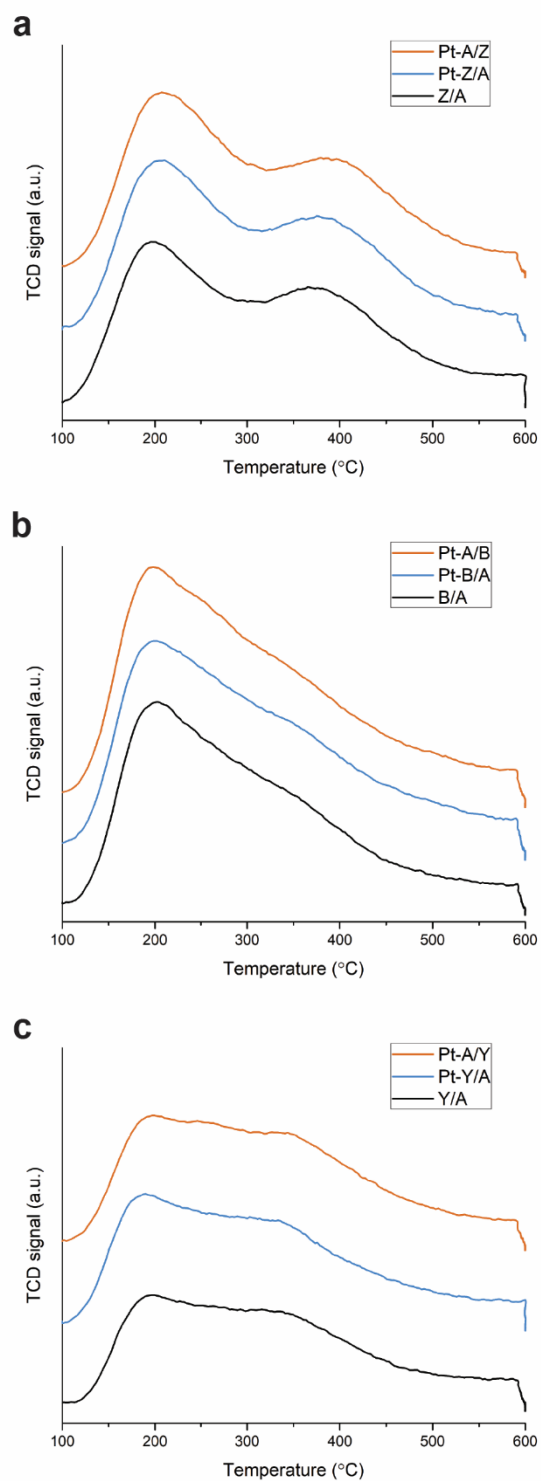

43  
 44 **Figure S2.** NH<sub>3</sub>-TPD profiles of the Pt/ $\gamma$ -Al<sub>2</sub>O<sub>3</sub>/zeolite composite catalysts and the  
 45 zeolite/ $\gamma$ -Al<sub>2</sub>O<sub>3</sub> composite support. Catalysts or supports are based on ZSM-5 (a), zeolite Beta (b),  
 46 and Zeolite Y (c).

47 **Table S3.** Total acidity of Pt/ $\gamma$ - Al<sub>2</sub>O<sub>3</sub>/zeolite composite catalysts and zeolite/ $\gamma$ - Al<sub>2</sub>O<sub>3</sub> composite  
 48 supports as obtained by NH<sub>3</sub>-TPD.

| Sample                                                         | Total<br>NH <sub>3</sub> desorped (mmol·g <sup>-1</sup> ) |
|----------------------------------------------------------------|-----------------------------------------------------------|
| Pt-A/Z                                                         | 0.79                                                      |
| Pt-Z/A                                                         | 0.75                                                      |
| Z/A (ZSM-5/ $\gamma$ - Al <sub>2</sub> O <sub>3</sub> )        | 0.70                                                      |
| Pt-A/B                                                         | 0.75                                                      |
| Pt-B/A                                                         | 0.72                                                      |
| B/A (Zeolite Beta/ $\gamma$ - Al <sub>2</sub> O <sub>3</sub> ) | 0.64                                                      |
| Pt-A/Y                                                         | 0.54                                                      |
| Pt-Y/A                                                         | 0.51                                                      |
| Y/A (Zeolite Y/ $\gamma$ - Al <sub>2</sub> O <sub>3</sub> )    | 0.41                                                      |



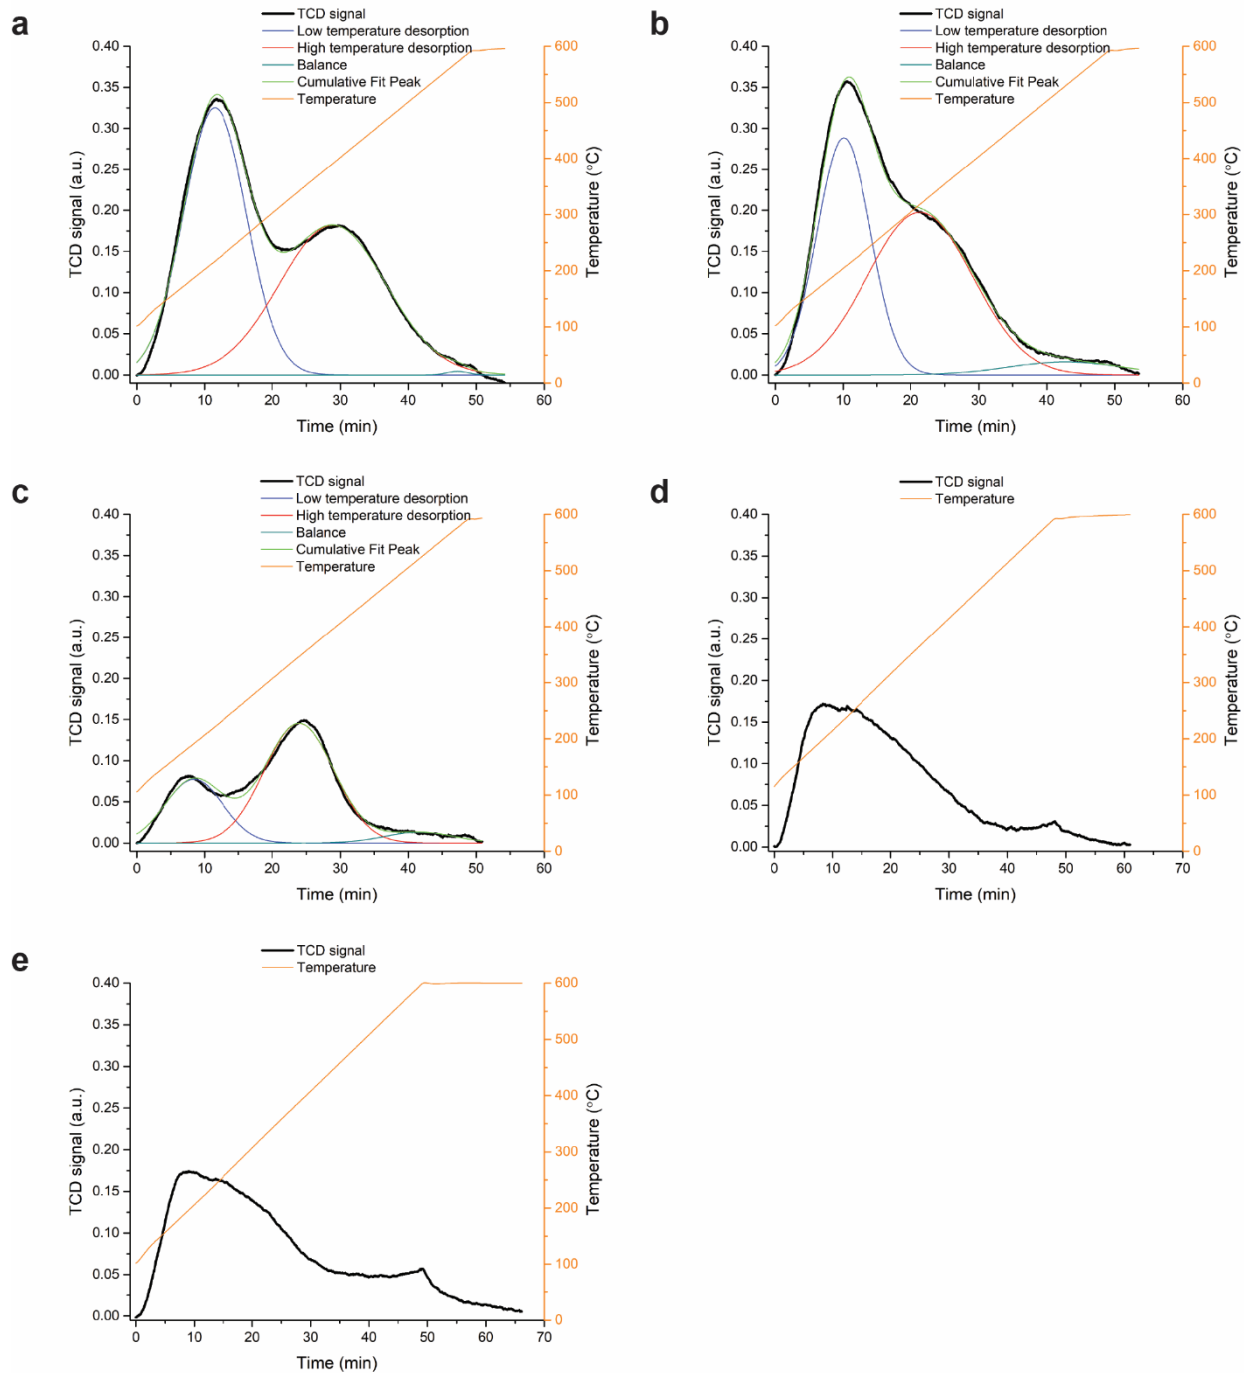

49

50 **Figure S3.** NH<sub>3</sub>-TPD profiles of parent ZSM-5 (a), zeolite Beta (b), zeolite Y (c)  $\gamma$ -Al<sub>2</sub>O<sub>3</sub> (d) and  
 51  $\gamma$ -Al<sub>2</sub>O<sub>3</sub> that was peptized with acetic acid prior to calcination (e).

52 **Table S4.** Results of deconvolution low temperature and high temperature desorption of the  
 53 NH<sub>3</sub>-TPD signal of parent zeolites. The total acidity is calculated by integration of the TCD signal  
 54 over the temperature range of 100-600°C.

|                                             | Si/Al<br>Zeolite | NH <sub>3</sub> desorbed<br>Low<br>temperature<br>(mmol <sub>NH<sub>3</sub></sub> ·g <sub>cat</sub> <sup>-1</sup> ) | NH <sub>3</sub> desorbed<br>High<br>temperature<br>(mmol <sub>NH<sub>3</sub></sub> ·g <sub>cat</sub> <sup>-1</sup> ) | Total NH <sub>3</sub><br>desorbed<br>(mmol <sub>NH<sub>3</sub></sub> ·g <sub>cat</sub> <sup>-1</sup> ) |
|---------------------------------------------|------------------|---------------------------------------------------------------------------------------------------------------------|----------------------------------------------------------------------------------------------------------------------|--------------------------------------------------------------------------------------------------------|
| ZSM-5                                       | 15               | 0.42                                                                                                                | 0.40                                                                                                                 | 0.82                                                                                                   |
| Zeolite Beta                                | 12.5             | 0.31                                                                                                                | 0.42                                                                                                                 | 0.73                                                                                                   |
| Zeolite Y                                   | 30               | 0.09                                                                                                                | 0.21                                                                                                                 | 0.32                                                                                                   |
| γ-Al <sub>2</sub> O <sub>3</sub>            | -                | -                                                                                                                   | -                                                                                                                    | 0.49                                                                                                   |
| γ-Al <sub>2</sub> O <sub>3</sub> (peptized) | -                | -                                                                                                                   | -                                                                                                                    | 0.56                                                                                                   |

55

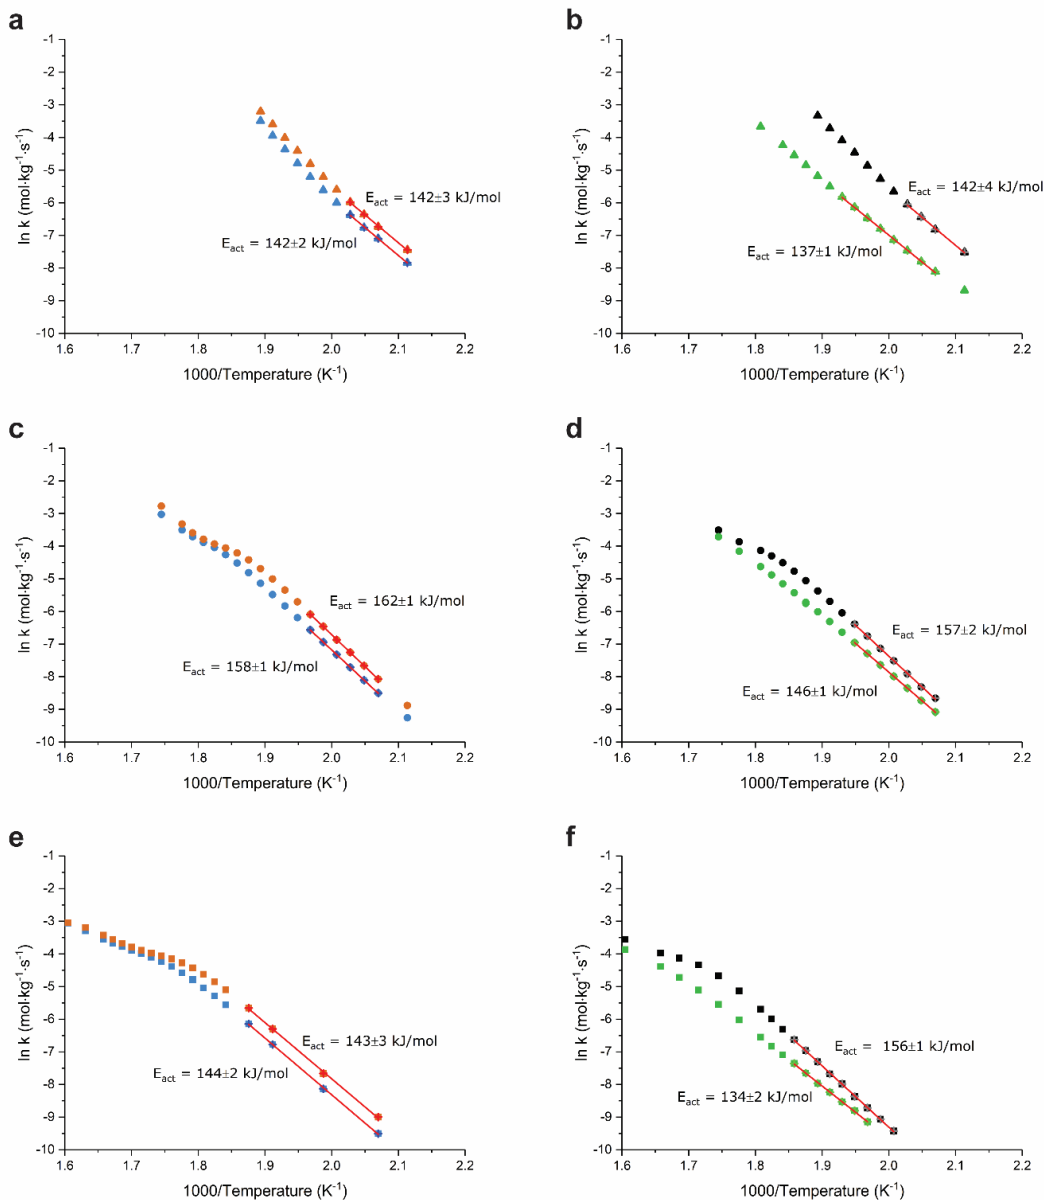

56  
 57 **Figure S4.** Arrhenius plots for ZSM-5 (a, b), Zeolite Beta (c, d) and Zeolite Y (e, f) based catalysts,  
 58 at a feedrate of  $2.6 \text{ g}_{n\text{-C}7} \cdot \text{g}_{\text{cat}} \cdot \text{h}^{-1}$ , 10 bar of total pressure and  $9 \text{ mol}_{\text{H}_2} / \text{mol}_{n\text{-C}7}$ . Catalyst with closest  
 59 intimacy between Pt sites and zeolite sites are indicated in blue, catalyst with a nanoscale intimacy  
 60 are indicated in orange, intimate physical mixtures are indicated in black while physical mixtures  
 61 of grains are indicated in green. The indicated errors of the apparent activation energies denote the  
 62 standard error of the fit. The first order rate constant was obtained from  $\ln(k) = \ln\left(-\frac{\ln(1-X)}{W/F}\right)$   
 63 wherein X is the n-C<sub>7</sub> conversion, W the catalyst mass (kg) and F the molar flow of n-heptane  
 64 (mol·s<sup>-1</sup>). Datapoints at relatively low conversion levels were fitted to a straight line, and the slope  
 65 of this line was then multiplied by -R (gasconstant,  $R = 8.314 \text{ J} \cdot \text{mol}^{-1} \cdot \text{K}^{-1}$ ) to obtain the apparent  
 66 activation energy. Previous kinetic studies by Guisnet et al. (Appl. Catal. 71 (1991) 295–306) and  
 67 Van de Runstraat et al. (J. Catal. 171 (1997) 77–84) have confirmed that a first order dependence  
 68 of relatively light hydrocarbons in hydro-isomerization is a valid assumption.

70 **Table S5.** Pre-exponential factors and apparent activation energies of Pt/ $\gamma$ -Al<sub>2</sub>O<sub>3</sub>/zeolite  
 71 composite catalysts and physical mixtures. The indicated errors of the activation energy denote the  
 72 standard error of the fit.

|                                    | Pre-exponential factor<br>(mol·kg <sup>-1</sup> ·s <sup>-1</sup> ) | Apparent activation<br>energy<br>(kJ·mol <sup>-1</sup> ) |
|------------------------------------|--------------------------------------------------------------------|----------------------------------------------------------|
| Pt-Z/A                             | 1.7·10 <sup>12</sup>                                               | 142 ± 2                                                  |
| Pt-A/Z                             | 2.7·10 <sup>12</sup>                                               | 142 ± 3                                                  |
| Intimate phys. mix. (ZSM-5)        | 2.6·10 <sup>12</sup>                                               | 142 ± 4                                                  |
| Phys. mix. grains (ZSM-5)          | 2.0·10 <sup>11</sup>                                               | 137 ± 1                                                  |
| Pt-B/A                             | 2.6·10 <sup>13</sup>                                               | 158 ± 1                                                  |
| Pt-A/B                             | 1.1·10 <sup>14</sup>                                               | 162 ± 1                                                  |
| Intimate phys. mix. (Zeolite Beta) | 1.7·10 <sup>13</sup>                                               | 157 ± 2                                                  |
| Phys. mix. grains (Zeolite Beta)   | 7.7·10 <sup>11</sup>                                               | 146 ± 1                                                  |
| Pt-Y/A                             | 2.9·10 <sup>11</sup>                                               | 144 ± 2                                                  |
| Pt-A/Y                             | 3.8·10 <sup>11</sup>                                               | 143 ± 3                                                  |
| Intimate phys. mix. (Zeolite Y)    | 1.8·10 <sup>12</sup>                                               | 156 ± 1                                                  |
| Phys. mix. grains (Zeolite Y)      | 5.9·10 <sup>9</sup>                                                | 134 ± 2                                                  |

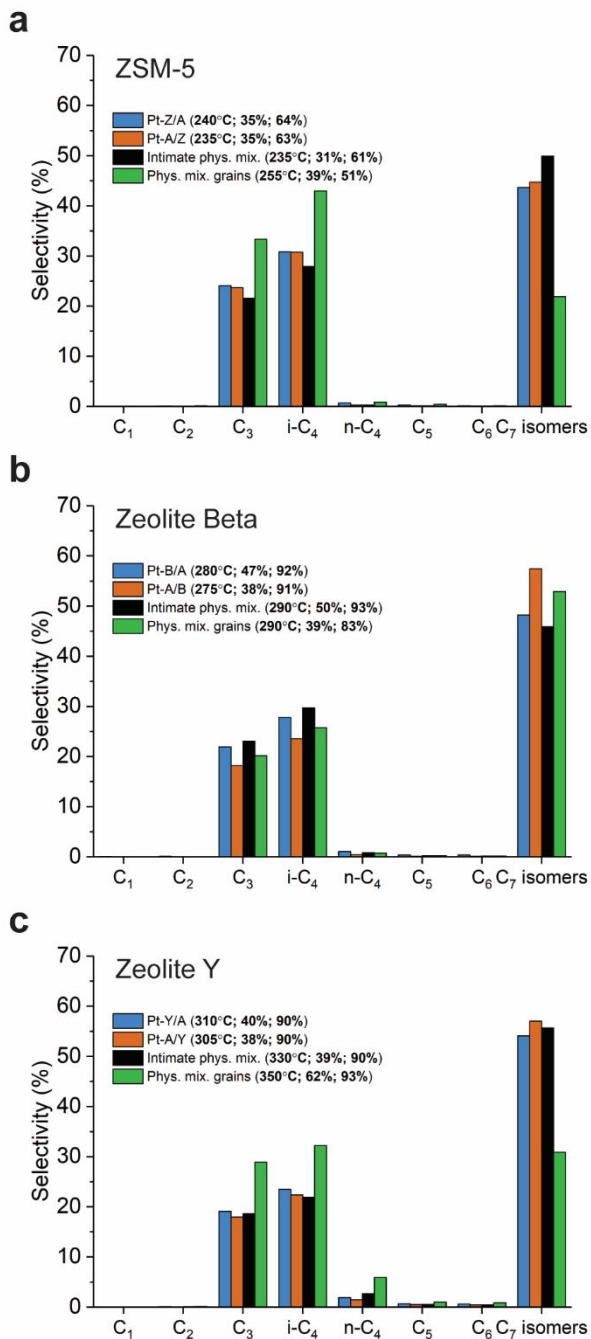

73

74 **Figure S5.** The cracking products distribution pattern for the ZSM-5 based catalysts (a), zeolite  
 75 Beta based catalysts (b) and zeolite Y based catalyst (c). Data between brackets denote: reactor  
 76 temperature; cracking conversion; total *n*-heptane conversion, respectively.

77

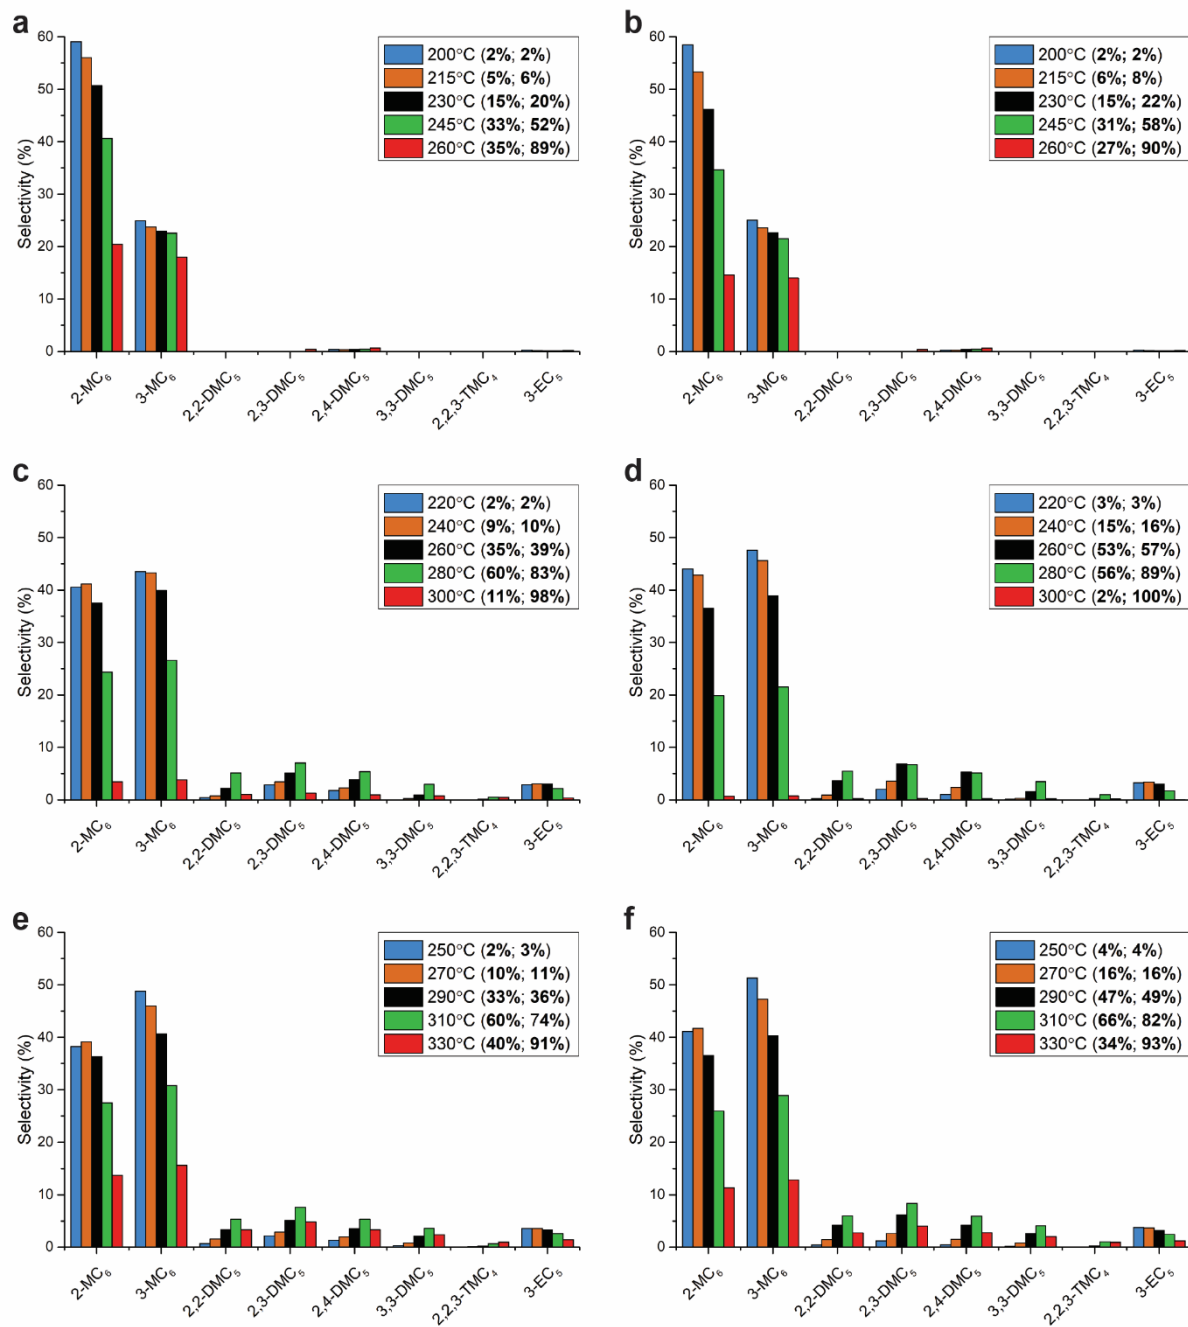

78

79 **Figure S6.** Isomer product distribution ZSM-5 (a,b), Zeolite Beta (c,d) and Zeolite Y (e,f) at a  
 80 feedrate of  $2.6 \text{ g}_{n-C7} \cdot \text{g}_{\text{cat}} \cdot \text{h}^{-1}$  and 10 bar of total pressure. Data between brackets denote: isomer  
 81 yield; total *n*-heptane conversion, respectively.

82

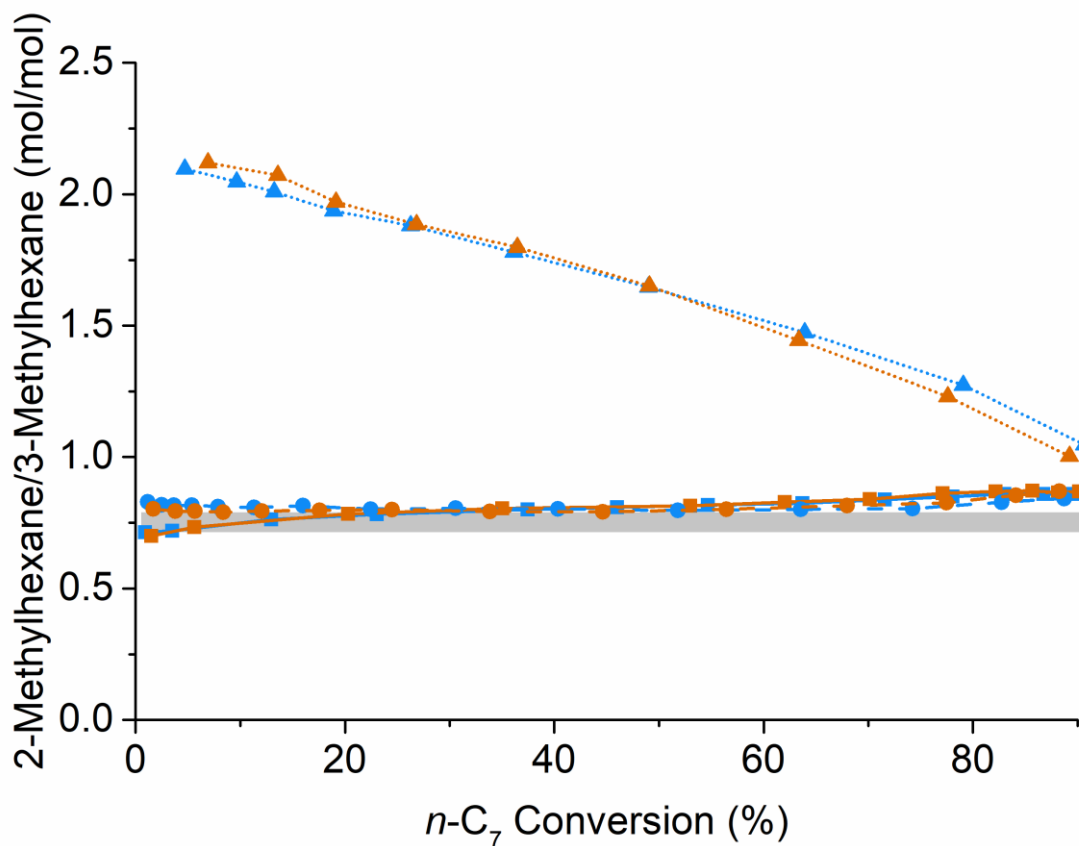

83  
 84 **Figure S7.** Ratio between 2-Methylhexane and 3-Methylhexane as a function of conversion for  
 85 ZSM-5 (triangles), zeolite Beta (circles) and zeolite Y (squares). Catalyst with Pt nanoparticles  
 86 located in the zeolite are indicated in blue, while catalyst with Pt nanoparticles located on the  $\gamma$ -  
 87 Al<sub>2</sub>O<sub>3</sub> binder indicated in orange. The grey rectangle indicates the value (2-Methylhexane/[(R)-3-  
 88 Methylhexane + (S)-3-Methylhexane]) at thermodynamic equilibrium between 200-300°C as was  
 89 computed with Outotec HSC Chemistry software, v9.

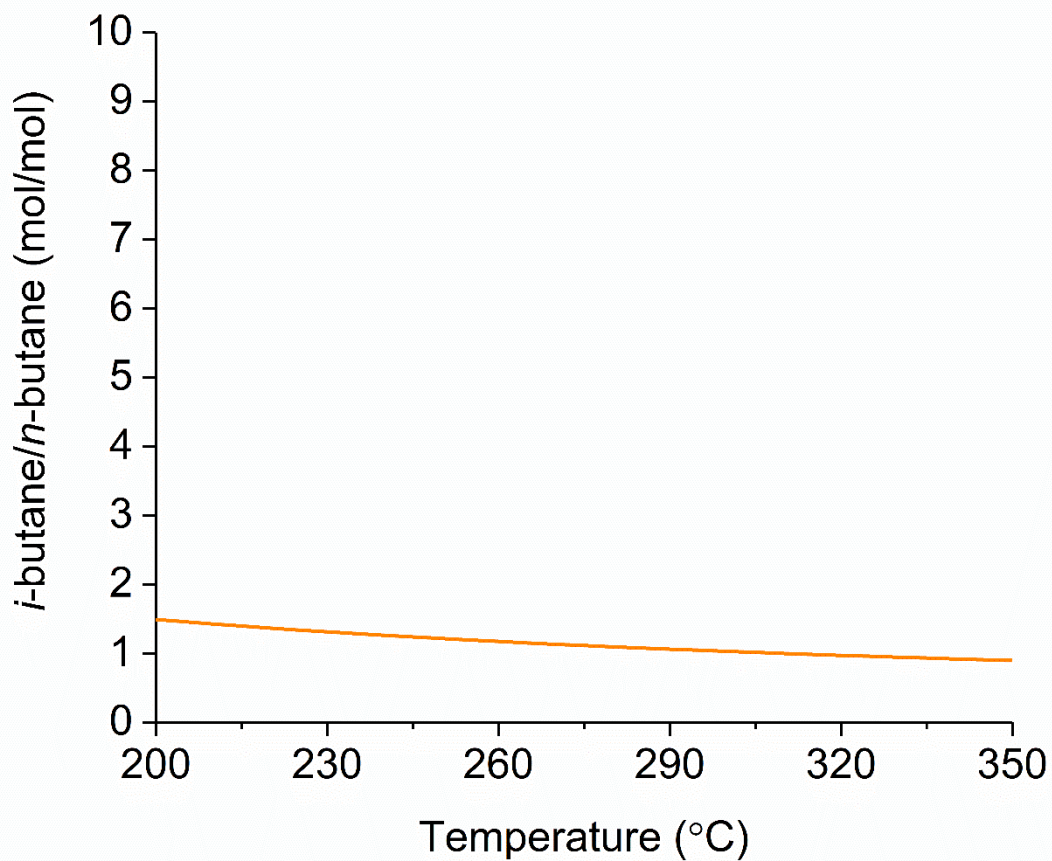

90  
91 **Figure S8:** Ratio between *i*-butane and *n*-butane (mol/mol) at thermodynamic equilibrium between  
92 200 and 350 °C. The value was computed with Outotec HSC Chemistry software, v9.



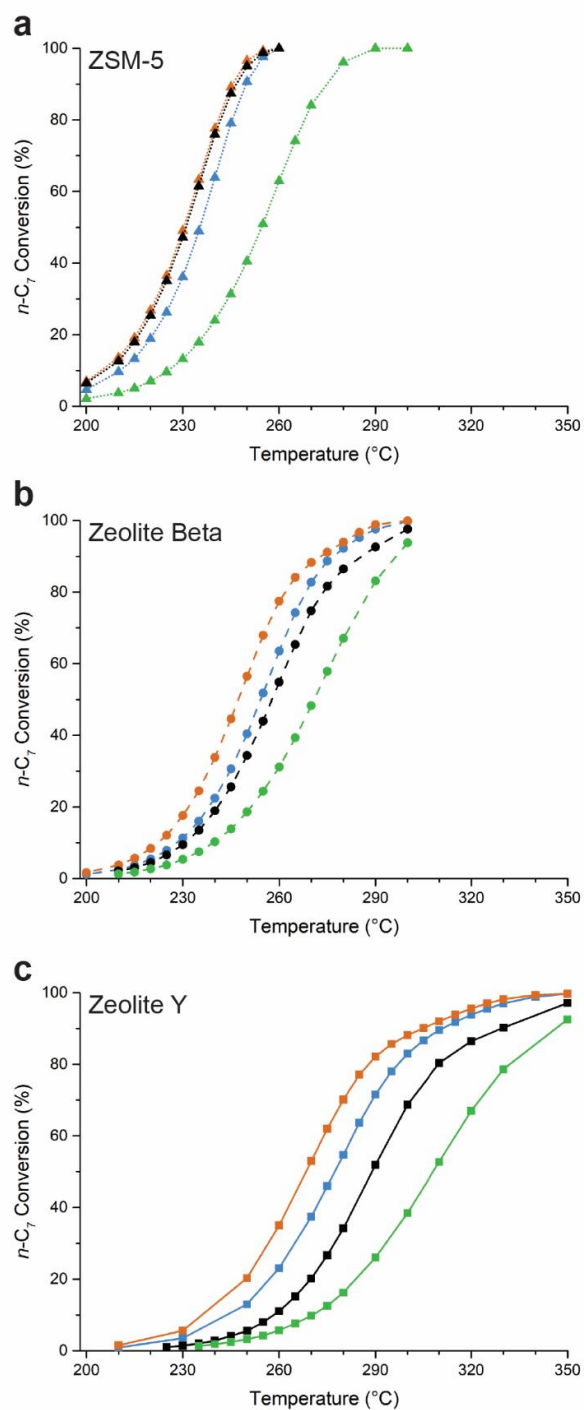

93

94 **Figure S9.** Conversion of *n*-heptane as a function of temperature of ZSM-5 (a), Zeolite Beta (b)  
 95 and Zeolite Y (c) at a feedrate of  $2.6 \text{ g}_{n\text{-C}7} \cdot \text{g}_{\text{cat}} \cdot \text{h}^{-1}$  at 10 bar of total pressure and  $9 \text{ mol}_{\text{H}_2} / \text{mol}_{n\text{-C}7}$ .  
 96 Catalyst with closest intimacy between Pt sites and zeolite sites are indicated in blue, catalyst  
 97 with a nanoscale intimacy are indicated in orange, intimate physical mixtures are indicated in  
 98 black while physical mixtures of grains are indicated in green.
